1

2 **FtsN activates septal cell wall synthesis by forming a**  
3 **processive complex with the septum-specific peptidoglycan**  
4 **synthase in *E. coli***

5 Zhixin Lyu<sup>1</sup>, Atsushi Yahashiri<sup>2</sup>, Xinxing Yang<sup>1,3</sup>, Joshua W. McCausland<sup>1</sup>, Gabriela M.  
6 Kaus<sup>2</sup>, Ryan McQuillen<sup>1</sup>, David S. Weiss<sup>2\*</sup>, Jie Xiao<sup>1\*</sup>

7 <sup>1</sup>Department of Biophysics and Biophysical Chemistry, Johns Hopkins School of Medicine,  
8 Baltimore, MD 21205, USA.

9 <sup>2</sup>Department of Microbiology and Immunology, University of Iowa Carver College of  
10 Medicine, Iowa City, IA 52242, USA.

11 <sup>3</sup>Current address: Hefei National Laboratory for Physical Science at the Microscale, CAS  
12 key Laboratory of Innate Immunity and Chronic Disease, School of Basic Medical  
13 Sciences, Division of Life Science and Medicine, University of Science and Technology of  
14 China, Hefei, China.

15 \*Corresponding authors: [david-weiss@uiowa.edu](mailto:david-weiss@uiowa.edu), [xiao@jhmi.edu](mailto:xiao@jhmi.edu)

## 16 Abstract

17 The FtsN protein of *Escherichia coli* and other proteobacteria is an essential and highly  
18 conserved bitopic membrane protein that triggers the inward synthesis of septal  
19 peptidoglycan (sPG) during cell division. Previous work has shown that the activation of  
20 sPG synthesis by FtsN involves a series of interactions of FtsN with other divisome  
21 proteins and the cell wall. Precisely how FtsN achieves this role is unclear, but a recent  
22 study has shown that FtsN promotes the relocation of the essential sPG synthase FtsWI  
23 from an FtsZ-associated track (where FtsWI is inactive) to an sPG-track (where FtsWI  
24 engages in sPG synthesis). Whether FtsN works by displacing FtsWI from the Z-track or  
25 capturing/retaining FtsWI on the sPG-track is not known. Here we use single-molecule  
26 imaging and genetic manipulation to investigate the organization and dynamics of FtsN at  
27 the septum and how they are coupled to sPG synthesis activity. We found that FtsN  
28 exhibits a spatial organization and dynamics distinct from those of the FtsZ-ring. Single  
29 FtsN molecules move processively as a single population with a speed of  $\sim 9 \text{ nm s}^{-1}$ ,  
30 similar to the speed of active FtsWI molecules on the sPG-track, but significantly different  
31 from the  $\sim 30 \text{ nm s}^{-1}$  speed of inactive FtsWI molecules on the FtsZ-track. Furthermore,  
32 the processive movement of FtsN is independent of FtsZ's treadmilling dynamics but  
33 driven exclusively by active sPG synthesis. Importantly, only the essential domain of FtsN,  
34 a three-helix bundle in the periplasm, is required to maintain the processive complex  
35 containing both FtsWI and FtsN on the sPG-track. We conclude that FtsN activates sPG  
36 synthesis by forming a processive synthesis complex with FtsWI exclusively on the sPG-  
37 track. These findings favor a model in which FtsN captures or retains FtsWI on the sPG-  
38 track rather than one in which FtsN actively displaces FtsWI from the Z-track.

39

## 40 Introduction

41 Most bacteria are completely encased in a peptidoglycan (PG) sacculus (or cell wall). The  
42 cell wall confers cell shape and protects against lysis by high internal osmotic pressure  
43 (up to  $\sim 3 \text{ atm}$  in Gram-negative *Escherichia coli*<sup>1</sup> and  $20 \text{ atm}$  in Gram-positive *Bacillus*  
44 *subtilis*<sup>2</sup>). The importance of the cell wall is underscored by the fact that it is one of the  
45 most successful antibiotic targets<sup>3, 4</sup>.

46 During cell division bacteria must synthesize and remodel their protective cell wall to  
47 accommodate the splitting of a mother cell into two daughter cells<sup>5</sup>. Bacterial cell division  
48 is mediated by the divisome, a loosely-defined collection of proteins that form a contractile  
49 ring-like assemblage at the division site. In *E. coli* the divisome contains over 30 different  
50 types of proteins, of which ten are essential and considered to constitute the core of the  
51 division apparatus<sup>6, 7</sup>. The ten essential division proteins are recruited to the divisome in a  
52 mostly sequential fashion, starting with the tubulin-like GTPase FtsZ<sup>8, 9</sup> and ending with  
53 the bitopic membrane protein FtsN, whose arrival coincides with the onset of visible  
54 septum constriction<sup>10, 11</sup>. Other noteworthy divisome proteins include FtsA, which links  
55 FtsZ polymers to the membrane<sup>12</sup>, the core septal PG (sPG) synthase complex composed  
56 of the polymerase FtsW and transpeptidase FtsI<sup>13, 14</sup>, and the FtsQLB complex, which  
57 regulates FtsWI activity<sup>15, 16</sup> (also see reviews<sup>5-7</sup>). According to current models, FtsN acts

58 through FtsA in the cytoplasm and the FtsQLB complex in the periplasm to activate  
59 synthesis of sPG by the FtsWI synthase complex<sup>15-21</sup>.

60 Although a small amount of FtsN is recruited early during divisome assembly by binding  
61 directly to FtsA, the majority of septal FtsN localizes later *via* binding of its C-terminal  
62 SPOR domain to the glycan backbone of PG at sites that lack stem peptides<sup>11, 17, 22-24</sup>. The  
63 SPOR domain binding sites, referred to here as “denuded” glycans, are a hallmark of sPG.  
64 Denuded glycans are created by cell wall amidases that process sPG to allow for daughter  
65 cell separation<sup>25</sup> and are subsequently degraded by lytic transglycosylases<sup>26</sup> (also see  
66 reviews<sup>5, 27, 28</sup>). Thus, denuded glycans accumulate only transiently in sPG.

67 Advanced high resolution and single-molecule imaging are providing important new  
68 insights into the organization of the divisome and the control of sPG synthesis<sup>29-36</sup>. One of  
69 these recent insights is that FtsZ uses GTP hydrolysis to move around the septum by  
70 treadmilling<sup>37-40</sup>, which is the apparent directional movement of a polymer caused by the  
71 continuous polymerization at one end and depolymerization at the other end, with  
72 individual monomers in the middle remaining stationary. Furthermore, in both *E. coli* and  
73 *B. subtilis*, FtsZ's treadmilling dynamics were found to drive the directional movement of  
74 the sPG synthesis complex FtsWI at a speed of  $\sim 30 \text{ nm s}^{-1}$ <sup>37, 38</sup>, likely through a Brownian  
75 ratchet mechanism<sup>41</sup>. Thus, FtsZ uses its GTPase activity-dependent treadmilling  
76 dynamics to function as a linear motor to distribute sPG enzyme complexes along the  
77 septum to ensure a smooth, symmetric septum synthesis<sup>29, 37, 38, 41</sup>.

78 More recently, we discovered that the *E. coli* divisome contains a second population of  
79 FtsWI, one that moves processively at  $\sim 8\text{-}9 \text{ nm s}^{-1}$ <sup>42</sup>. Movement of this slower population  
80 is driven by active PG synthesis (termed as on the sPG-track) rather than FtsZ treadmilling  
81 (termed as on the Z-track). Similar FtsZ-independent but sPG synthesis-dependent  
82 processive populations of FtsW and PBP2x were first observed in *S. pneumoniae*<sup>40</sup>. In *E.*  
83 *coli* individual FtsW or FtsI molecules can transition back-and-forth between the fast- and  
84 slow-moving populations. In cells depleted of FtsN, the active, slow-moving population of  
85 FtsWI on the sPG-track is diminished while the inactive, fast-moving population of FtsWI  
86 on the Z-track is enhanced. These findings imply that FtsN activates sPG synthesis, at  
87 least in part, by increasing the number of FtsWI molecules on the sPG-track<sup>42</sup>. Whether  
88 FtsN accomplishes this by releasing FtsWI from the Z-track or retaining FtsWI on the sPG-  
89 track is not yet known.

90 In this work, we use single-molecule imaging to investigate the organization and  
91 dynamics of FtsN at the septum and how they are coupled to sPG synthesis. We found  
92 that FtsN exhibits distinct spatial organization and dynamics from the FtsZ-ring, supporting  
93 the previous notion that the FtsN-ring organization is independent of the FtsZ-ring<sup>43</sup>. Most  
94 importantly, we observed that single FtsN molecules move exclusively and processively  
95 at a slow speed of  $\sim 9 \text{ nm s}^{-1}$  at the septum. The processive movement of FtsN depends  
96 on active sPG synthesis but not FtsZ's treadmilling dynamics. These dynamic behaviors  
97 are identical to those of the slow-moving, active population of FtsWI. Moreover, only the  
98 essential domain of FtsN, a helix bundle in the periplasm, is required for processive  
99 movement of FtsN on the sPG-track. These findings support a model whereby FtsN  
100 activates sPG synthesis by forming a processive complex with FtsWI through the essential  
101 domain to maintain it on the sPG-track and thus promote the synthesis of sPG.

## 102 Results

### 103 Construction of functional FtsN fusions

104 FtsN has at least four functional domains (**Figure 1A, Figure S1**): an N-terminal  
105 cytoplasmic tail (FtsN<sup>Cyto</sup>) that interacts with FtsA<sup>17, 19, 20</sup>; a transmembrane domain (FtsN<sup>TM</sup>)  
106 that anchors FtsN to the inner membrane<sup>44</sup>; a periplasmic essential domain (FtsN<sup>E</sup>) that is  
107 composed of three helices and responsible for activating sPG synthesis activity<sup>11, 45</sup>, and  
108 a C-terminal periplasmic SPOR domain (FtsN<sup>SPOR</sup>) that binds to denuded glycan strands,  
109 which are transiently present at the septum during cell wall constriction<sup>11, 22-24, 45, 46</sup>. To  
110 identify functional fluorescent fusions of FtsN, we designed and screened 11 FtsN fusions  
111 that have a green fluorescent protein mNeonGreen (mNeG)<sup>47</sup> fused to the N-terminus, C-  
112 terminus or inserted at internal positions of FtsN (**Figure S1**). These fusions were  
113 expressed from plasmids in an FtsN-depletion background to test their functionality  
114 (**Figure S2**). We were able to identify an N-terminal and an internal (termed sandwich,  
115 between E60 and E61) fusion of FtsN that supported normal growth on solid and liquid  
116 media in FtsN depletion backgrounds (**Figure S2A, B**), and exhibited correct midcell  
117 localization during cell division (**Figure S2C**). Based on these results we constructed  
118 additional fusions to various fluorescent proteins for different imaging purposes, including  
119 the N-terminal fusions mEos3.2-FtsN, GFP-FtsN, and the sandwich fusion FtsN-Halo<sup>SW</sup>  
120 (**Figure S3** and **Supplemental Notes**). These fusions were integrated into the  
121 chromosome at a phage attachment site in an FtsN-depletion strain constructed by  
122 replacing *ftsN*'s native promoter with the arabinose-dependent  $P_{BAD}$  promoter<sup>48</sup> (**Table S1**).  
123 Expression, stability and functionality of these fusions were further validated by Western  
124 blotting and cell growth measurements (**Figure S3**).

### 125 The FtsN-ring exhibits different spatiotemporal organization and 126 dynamics from the FtsZ-ring

127 FtsN is expressed at a level of ~ 300 molecules per cell<sup>49</sup> (**Figure S4**) and forms a ring-  
128 like structure (FtsN-ring) at the midcell similar to the FtsZ-ring<sup>43</sup>. To understand the spatial  
129 organization of the FtsN-ring, we performed astigmatism-based three-dimensional (3D)  
130 single-molecule localization microscopy (SMLM)<sup>50</sup> imaging in live *E. coli* cells using an  
131 mEos3.2-FtsN fusion (Strain EC4443 in **Table S1**). Under our imaging condition, we  
132 achieved a spatial resolution of ~ 50 nm in the xy axis and ~ 80 nm in z axis (**Figure S5B**).  
133 Similar to what we and others have observed for the FtsZ-ring<sup>33, 35, 36, 51, 52</sup>, FtsN-rings are  
134 patchy and have comparable dimensions to FtsZ-rings (**Figure 1B, Figure S5C, and**  
135 **Table S5**). However, autocorrelation analysis showed that the FtsN molecules in the FtsN-  
136 ring are more homogeneously distributed than those in the FtsZ-ring (**Figure 1C**), indicating  
137 a different spatial organization of the FtsN-ring.

138 Next, we sorted individual cells by their ring diameters to generate a pseudo time lapse  
139 representing the cell wall constriction process. We found that FtsN-rings assemble at a  
140 ring diameter of ~ 600 nm and disassemble at ~ 300 nm (**Figure 1D**). In contrast, under  
141 the same experimental condition FtsZ-rings assemble at ~ 950 nm and start to  
142 disassemble at ~ 600 nm (**Figure 1D**). These results demonstrate that the FtsN-ring  
143 assembles and disassembles at cell wall constriction stages significantly later than the Z-  
144 ring.

145 We next investigated whether the FtsN-ring exhibits similar dynamic subunit turnovers  
146 as were observed for the FtsZ-ring<sup>53, 54</sup>. To do so we carried out Fluorescence Recovery  
147 After Photobleaching (FRAP) experiments using a GFP-FtsN fusion (**Figure S6**,  
148 **Supplemental Movie 1**, Strain EC4240 in **Table S1**). By bleaching half of the ring, we  
149 found that the recovery curve of GFP-FtsN exhibited two apparent phases (**Figure 1E**), a  
150 fast phase with a recovery half time  $\tau_{1/2} = 2.9 \pm 0.8$  s, and a slow phase with  $\tau_{1/2} = 54 \pm 10$   
151 s ( $\mu \pm s.e.m.$ ,  $n = 58$  cells). Most interestingly, we only observed a  $\sim 70\%$  recovery of  
152 FtsN's intensity compared to that prior to bleaching, indicating that a population of FtsN  
153 molecules were stationary on the time scale of the experiment (150 s). In comparison, at  
154 the same time scale the FtsZ-ring recovered with a half time of  $\sim 16$  s and to  $\sim 90\%$  of the  
155 intensity prior to bleaching (**Figure 1E**, data from a previous work<sup>38</sup>). The fast recovery  
156 phase of FtsN was also previously observed by Söderström *et al.*<sup>43</sup>, which is most likely  
157 due to the random diffusion of FtsN molecules in and out of the septum as expected for a  
158 typical inner membrane protein (**Supplemental Notes**). The slow recovery phase,  
159 however, is significantly slower than that of FtsZ, indicating that FtsN-ring exhibits different  
160 dynamics compared to the FtsZ-ring.

161 Taken together, these results are consistent with previous observations that FtsN and  
162 FtsZ do not colocalize with each other at the molecular scale revealed by superresolution  
163 imaging<sup>43</sup>. They suggest that the spatiotemporal organization and dynamics of FtsN are  
164 most likely independent of FtsZ.

## 165 **FtsN clusters exhibit slow, directional motions**

166 To investigate what type of dynamics contribute to the observed slow FRAP behavior, we  
167 imaged FtsN-rings using an mNeG-FtsN fusion (Strain EC4564 in **Table S1**) with  
168 structured illumination microscopy coupled with total internal reflection excitation (TIRF-  
169 SIM)<sup>55, 56</sup>. TIRF-SIM allowed us to monitor the dynamics of FtsN-rings with a spatial  
170 resolution of  $\sim 100$  nm and a time resolution of 100 ms. Similar to what we observed in  
171 3D-SMLM imaging, fluorescence of FtsN-rings was patchy and clustered (**Figure 1F**,  
172 **Figure S7B**). Kymograph analysis showed that some FtsN clusters are stationary and  
173 remained at the same position throughout the imaging time (40 s, **Figure 1F**, arrow,  
174 **Supplemental Movie 2**). These stationary FtsN clusters likely explain the fraction of  
175 unrecovered FRAP signal. However, some FtsN clusters exhibited apparently transverse,  
176 processive movement across the short axis of the cell (**Figure 1F**, arrowhead,  
177 **Supplemental Movie 2**). The mean directional speed measured from these kymographs  
178 was at  $8.8 \pm 0.3$  nm s<sup>-1</sup>, ( $\mu \pm s.e.m.$ ,  $n = 92$  clusters). These directionally moving FtsN  
179 clusters are likely the ones contributing to the slow recovery rate of FRAP, as it takes  $\sim$   
180 60 s for an FtsN cluster at this speed to cross the TIRF-SIM imaging field ( $\sim 500$  nm,  
181 **Supplemental Notes**). We further confirmed that the directional motion was not due to  
182 SIM imaging artifacts as we obtained the same result ( $v = 8.6 \pm 0.3$  nm s<sup>-1</sup>,  $\mu \pm s.e.m.$ ,  $n =$   
183 113 clusters) using the same mNeG-FtsN fusion in conventional TIRF imaging even  
184 though the spatial resolution was lower (**Figure S7A**). The directional motion was not due  
185 to stage drifting either, because we observed both stationary and moving clusters in the  
186 same cells (**Figure 1F**). Furthermore, in fixed cells, the directional, processive movement  
187 of FtsN was completely abolished (**Figure S7B**). The combined  $\sim 9$  nm s<sup>-1</sup> directional  
188 moving speed of FtsN clusters (**Table S6**) is significantly slower than the treadmilling

189 speed of FtsZ polymers ( $\sim 30 \text{ nm s}^{-1}$ )<sup>37, 38</sup> (**Figure 1G**), again demonstrating that this  
190 motion is distinct from the treadmilling dynamics of FtsZ.

## 191 **Individual FtsN molecules exhibit slow, directional motions**

192 Apparent directional motion of a protein cluster can arise from the coordinated  
193 directional movement of individual protein molecules in the cluster or treadmilling  
194 dynamics. The latter has been reported for a few bacterial cytoskeletal proteins<sup>57, 58</sup>, most  
195 recently FtsZ<sup>37-40</sup> and PhuZ<sup>59</sup>. To distinguish between these two possibilities, we used 3D  
196 single-molecule tracking (3D-SMT) to investigate the movement of single FtsN molecules.

197 To facilitate SMT, we used a FtsN-Halo<sup>SW</sup> fusion (Strain EC5234 in **Table S1**) that can  
198 be sparsely labeled with the bright organic dye JF646 added into the growth medium<sup>60</sup>.  
199 The Halo tag is inserted after amino acid E60, between the TM and E domains in the  
200 periplasm (**Figure S1**). We tracked septum-localized single FtsN-Halo<sup>SW</sup> molecules using  
201 a frame rate of 1 Hz to effectively filter out fast, randomly diffusing molecules along the  
202 cylindrical part of the cell body. Using a custom-developed unwrapping algorithm<sup>41, 42</sup>, we  
203 decomposed 3D trajectories of individual FtsN molecules obtained from the curved cell  
204 surfaces at midcell to one-dimensional (1D) trajectories along the circumference and long  
205 axis of the cell respectively as previously described<sup>42</sup>.

206 We found that some FtsN molecules were confined to small regions at the septum and  
207 stayed stationary (**Figure 2A**). Some moved directionally across the cell's short axis  
208 (**Figure 2B**). Some others dynamically transitioned in between different moving speeds  
209 and directions (**Figure 2C**). To quantify these behaviors, we used a trajectory  
210 segmentation method we previously described<sup>41, 42</sup> and classified segments as either  
211 stationary or moving directionally based on a statistical criterion (**Supplemental Notes**).  
212 We found that, on average,  $\sim 55\%$  ( $55.1 \pm 1.6\%$ ) of the segments were classified as  
213 stationary (**Figure 2D**, solid black) with an average dwell time of  $\sim 27 \text{ s}$  ( $27.3 \pm 1.3 \text{ s}$ ,  $\mu \pm$   
214  $s.e.m.$ ,  $n = 315$  segments, **Table S10**). For the rest of the segments, FtsN molecule  
215 engages in directional movement as a single population (**Figure S8**) at the septum with  
216 an average run time of  $\sim 15 \text{ s}$  ( $14.5 \pm 0.7 \text{ s}$ ,  $\mu \pm s.e.m.$ ,  $n = 256$  segments, **Table S10**) and  
217 average run speed of  $9.4 \pm 0.2 \text{ nm s}^{-1}$  ( $\mu \pm s.e.m.$ , **Figure 2D**, solid red, **Table S10**).  
218 Notably, with the two-sample Kolmogorov-Smirnov (K-S) test, the speed distribution is  
219 essentially the same as what we observed for mNeG-FtsN clusters using TIRF-SIM  
220 (**Figure S9**), similar to what we previously measured for the slow-moving population of  
221 active FtsW and FtsI engaged on the sPG-track in our recent studies<sup>42</sup> (average at  $9.4 \pm$   
222  $0.3 \text{ nm s}^{-1}$ , **Figure 2D**, red dash), and has a minimal overlap with FtsZ's treadmilling speed  
223 distribution under the same condition (average at  $28.0 \pm 1.2 \text{ nm s}^{-1}$ , **Figure 2D**, gray dash).  
224 Thus, FtsN's directional movement resembles that of the active, slow-moving population  
225 of FtsWI on the sPG-track, but not the inactive, fast-moving population of FtsWI on the  
226 FtsZ-track.

## 227 **FtsN's slow, directional movement is independent of FtsZ's** 228 **treadmilling dynamics**

229 Our previous studies have shown that the slow-moving population of FtsWI is independent  
230 of FtsZ's treadmilling dynamics but dependent on active sPG synthesis<sup>42</sup>. Because the  
231 speed distribution of FtsN largely overlaps with that of the slow-moving population of FtsWI

232 **(Figure 2D)**, we reasoned that FtsN likely moves together with FtsWI as part of an active  
233 sPG synthesis complex. If so, we would expect that FtsN's motion depends on active sPG  
234 synthesis but not on FtsZ's treadmilling dynamics in the same manner as FtsWI.

235 To test whether FtsN's motion is FtsZ-dependent, we performed SMT of FtsN-Halo<sup>SW</sup>  
236 in four FtsZ GTPase mutant strains which show progressively slower treadmilling speeds  
237 (*ftsZ*<sup>E238A</sup>, *ftsZ*<sup>E250A</sup>, *ftsZ*<sup>D269A</sup>, and *ftsZ*<sup>G105S</sup>). As expected, the average speed of  
238 directionally moving FtsN molecules in these mutants remained constant at ~ 9 nm s<sup>-1</sup>  
239 **(Figure 2E, Table S7)**, independent of FtsZ's treadmilling speed **(Figure 2E, H)**. This  
240 behavior is essentially the same as the slow-moving, active population of FtsW and FtsI<sup>42</sup>.  
241 Similarly, the percentage of FtsN molecules that were moving directionally remained  
242 constant in these mutant backgrounds **(Figure 2E, H)**. These results demonstrate that  
243 FtsN's slow-moving dynamics are not driven by FtsZ's treadmilling dynamics.

### 244 **FtsN's slow, directional movement is independent of its** 245 **cytoplasmic domain**

246 The independence of FtsN's directional motion from FtsZ dynamics is somewhat  
247 unexpected in light of previous reports that the N-terminal cytoplasmic domain (Cyto) of  
248 FtsN can localize to the midcell through its direct interaction with the 1C domain of FtsA<sup>17</sup>.  
249 <sup>19, 20, 61-65</sup>. To address whether this or any other cytoplasmic interaction contributes to the  
250 ~ 9 nm s<sup>-1</sup> directional movement of FtsN, we constructed two FtsN mutants **(Figure 2F)**.  
251 One mutant contains a D5N mutation in the N-terminal cytoplasmic domain (FtsN<sup>D5N</sup>-  
252 Halo<sup>SW</sup>, Strain EC5271 in **Table S1**) that has been shown to reduce the interaction  
253 between FtsN and FtsA<sup>20</sup>. In the other mutant we deleted the entire cytoplasmic and  
254 transmembrane domains, fusing the periplasmic region of FtsN to the cleavable signal  
255 sequence from DsbA to export the fusion directly to the periplasm (DsbA<sup>ss</sup>-Halo-FtsN<sup>ΔCyto-</sup>  
256 <sup>TM</sup>, Strain EC5263 in **Table S1**). Both mutants were able to support cell division as the  
257 sole cellular FtsN copy expressed from the endogenous chromosomal locus and showed  
258 prominent midcell localization, but cells were both longer than WT ones **(Figure 2F,**  
259 **Figure S10)**, likely due to delayed initiation or slowed rate of cell wall constriction because  
260 of the lack of the N-terminal interactions. Interestingly, both mutants exhibited essentially  
261 unchanged percentage or speed of the directionally moving population **(Figure 2G, H,**  
262 **Table S8)**. These results strongly suggest that the interactions between the cytoplasmic  
263 domain of FtsN and FtsA do not contribute to the observed slow-moving dynamics of FtsN.

### 264 **FtsN's cytoplasmic domain exhibits fast, FtsZ treadmilling-** 265 **dependent directional movement**

266 Although we did not observe any FtsZ-dependent directional motion of FtsN as what we  
267 observed for FtsWI, we reasoned that the cytoplasmic interaction between FtsN and FtsA  
268 may still be able to mediate the end-tracking behavior of FtsN on treadmilling FtsZ  
269 polymers using a Brownian ratchet mechanism as we previously predicted<sup>41</sup>. This  
270 interaction may only exist in cells at an early divisome assembly stage, which were not  
271 well represented in the imaging samples, and it may be diminished after FtsN is recruited  
272 to the midcell due to the presence of FtsN's periplasmic interactions with other divisome  
273 proteins and/or the denuded glycan strands.

274 To examine this possibility, we constructed a FtsN<sup>Cyto-TM</sup>-Halo<sup>SW</sup> fusion, in which the E  
275 and SPOR domains of FtsN are removed and a Halo tag is inserted in the same position  
276 (E60-E61) as the full-length sandwich fusion (**Figure 2I**, Strain EC5317 in **Table S1**).  
277 Because FtsN<sup>Cyto-TM</sup> cannot support cell division by itself, we expressed it ectopically from  
278 the chromosome in the presence of WT FtsN. Ensemble fluorescence imaging showed  
279 that FtsN<sup>Cyto-TM</sup>-Halo<sup>SW</sup> exhibits patchy fluorescence along the cell perimeter and has  
280 markedly decreased midcell localization compared to full length FtsN (**Figure 2I**). This  
281 observation is consistent with FtsN<sup>Cyto-TM</sup> having a transmembrane domain but not the  
282 SPOR domain, which is the major septum localization determinant<sup>11, 24</sup>. Further mutating  
283 the conserved D5 residue in the cytoplasmic domain (FtsN<sup>Cyto-TM-D5N</sup>-Halo<sup>SW</sup>, Strain  
284 EC5321 in **Table S1**) completely abolished any residual midcell localization (**Figure 2I**),  
285 demonstrating that the limited midcell localization of FtsN<sup>Cyto-TM</sup>-Halo<sup>SW</sup> is indeed mediated  
286 by FtsN's interaction with FtsA.

287 Despite the poor septal localization, we were able to track remaining single FtsN<sup>Cyto-TM</sup>-  
288 Halo<sup>SW</sup> molecules at the midcell in a series of FtsZ GTPase WT and mutant backgrounds.  
289 Strikingly, we found that now in ~ 60% (62.5 ± 1.9%) of the SMT segments FtsN<sup>Cyto-TM</sup>-  
290 Halo<sup>SW</sup> molecules moved at an average speed of ~ 30 nm s<sup>-1</sup> (29.1 ± 1.7 nm s<sup>-1</sup>,  $\mu \pm s.e.m.$ ,  
291  $n = 130$  segments, **Figure 2J**, **Table S9**) in the FtsZ WT background, similar to FtsZ's  
292 treadmilling speed. In four FtsZ GTPase mutant strains (*ftsZ*<sup>E238A</sup>, *ftsZ*<sup>E250A</sup>, *ftsZ*<sup>D269A</sup>, and  
293 *ftsZ*<sup>G105S</sup>), we observed progressively reduced speed and population percentage of  
294 directionally-moving FtsN<sup>Cyto-TM</sup>-Halo<sup>SW</sup> (**Figure 2K**, **Table S9**). There was no discernible  
295 slow-moving population of FtsN<sup>Cyto-TM</sup>-Halo<sup>SW</sup> under any of these conditions. These results  
296 strongly suggest that *in vivo* the cytoplasmic interaction between FtsN<sup>Cyto-TM</sup> and FtsA is  
297 able to drive the FtsZ treadmilling-dependent end-tracking behavior of FtsN<sup>Cyto-TM</sup> and that  
298 this interaction is diminished once FtsN's periplasmic interactions take place during the  
299 process of cell division. A previous *in vitro* study showed that membrane-anchored  
300 cytoplasmic domain of FtsN is capable of following treadmilling FtsZ polymers through a  
301 diffusion-and-capture mechanism<sup>66</sup>, but does not directionally end-track FtsZ at the single-  
302 molecule level as what we observed here. This difference is most likely due to the more  
303 restricted diffusion of FtsN<sup>Cyto-TM</sup> along the septum area *in vivo* compared to that *in vitro*,  
304 as we previously predicted in a Brownian ratchet model<sup>41</sup>.

305

## 306 **FtsN's directional movement depends on sPG synthesis**

307 Our results so far demonstrated that the slow, directional movement of full length FtsN is  
308 independent of FtsZ's treadmilling dynamics. To examine whether it is driven by active  
309 sPG synthesis as that for the slow-moving population of FtsWI<sup>42</sup>, we performed SMT of  
310 FtsN-Halo<sup>SW</sup> under conditions of altered sPG synthesis activities.

311 We first examined the effect of inhibiting FtsW's glycosyltransferase (GTase) activity  
312 on the movement of FtsN-Halo<sup>SW</sup> using a functional FtsW variant, FtsW<sup>I302C</sup>, which can be  
313 specifically inhibited upon the addition of the cysteine-reactive reagent MTSES (2-  
314 sulfonatoethylmethanethiosulfonate)<sup>42</sup>. In this strain background, FtsN-Halo<sup>SW</sup> exhibited  
315 similar dynamics as in the parent FtsW<sup>WT</sup> cells (**Figure 3A**, top two panels, **Table S10**). In  
316 the presence of MTSES (100  $\mu$ M, 60 min), however, the directionally moving population  
317 of FtsN-Halo<sup>SW</sup> was significantly reduced and on average ~ 80% of segments were  
318 stationary (80.4 ± 1.4%,  $n = 115$  segments, **Figure 3A, C**, **Table S10**). The depletion of



319 the moving population is essentially identical to the depletion of the slow-moving  
320 population of FtsW<sup>I302C</sup> in the presence of MTSES and suggests that the directional motion  
321 of FtsN is coupled to FtsW and its GTase activity.

322 Next, we tracked the movement of FtsN-Halo<sup>SW</sup> in the presence of aztreonam, an  
323 antibiotic that specifically inhibits the transpeptidase (TPase) activity of FtsI<sup>67</sup>. In cells  
324 treated with aztreonam (1  $\mu\text{g ml}^{-1}$ , 30 min), we observed that the directionally moving  
325 population of FtsN was again substantially reduced and  $\sim 90\%$  of FtsN's SMT segments  
326 showing stationary at the septum (**Figure 3B, C, Table S10**). In addition, depleting the  
327 cell wall precursor Lipid II using fosfomycin (inhibits the essential lipid II synthesis enzyme  
328 MurA<sup>68</sup>, 200  $\mu\text{g ml}^{-1}$ , 30 min) resulted in near complete abolishment of the directionally  
329 moving population of FtsN, approaching to the background level in fixed cells (**Figure 3B,**  
330 **C, Table S10**). All these behaviors are, again, identical to the depletion of the slow-moving  
331 population of FtsW under identical conditions as we previously observed<sup>42</sup>.

332 To probe the dynamics of FtsN under conditions of enhanced cell wall synthesis, we  
333 made use of an *fts*<sup>R167S</sup> superfission variant strain, which partially alleviates the need for  
334 FtsN<sup>42</sup>. Previously we showed that by growing *fts*<sup>R167S</sup> cells in a rich defined medium  
335 (EZRDM) or by overexpressing the undecaprenyl pyrophosphate synthetase (UppS, an  
336 enzyme responsible for making Lipid II<sup>69</sup>) in the same strain, the percentage of directionally  
337 moving FtsW molecules on the slow sPG-track increased to nearly 100% and their speed  
338 increased to  $\sim 13 \text{ nm s}^{-1}$ <sup>42</sup>. If FtsN is in complex with FtsWI and its movement is coupled  
339 to FtsWI's activity, we should observe similar changes in FtsN's dynamics.

340 We first tracked the dynamics of FtsN-Halo<sup>SW</sup> in *fts*<sup>R167S</sup> cells growing in minimal M9  
341 medium and the rich defined EZRDM medium. We observed that the average speed of  
342 FtsN accelerated from  $9.4 \pm 0.3 \text{ nm s}^{-1}$  in M9 to  $12.3 \pm 0.5 \text{ nm s}^{-1}$  in EZRDM (**Figure 3D,**  
343 **E, Table S10**). Overexpressing UppS further increased the average speed of FtsN to  $13.7$   
344  $\pm 0.5 \text{ nm s}^{-1}$  (**Figure 3D, E, Table S10**). These increased speeds are similar to those of  
345 the slow-moving population of FtsW under the same conditions<sup>42</sup>. Most importantly, the  
346 distributions of the speed, processive run length and run time of FtsN-Halo<sup>SW</sup> are  
347 indistinguishable from those of FtsW under the EZRDM and UppS overexpression  
348 conditions, where FtsW essentially only exhibits one slow-moving population (**Figure S11,**  
349 **Table S11**), strongly suggesting that FtsN forms an active, processive sPG synthesis  
350 complex with FtsWI.

## 351 **FtsN's E domain is sufficient for forming a processive complex** 352 **with FtsWI on the sPG-track**

353 What interaction mediates the processive complex between FtsN and FtsWI? Past studies  
354 have shown that a short fragment of FtsN comprising only the second helix in the  
355 periplasmic E domain is both necessary and sufficient for cell division when  
356 overexpressed<sup>11, 19</sup>. An FtsN mutant containing changes in two conserved amino acids in  
357 the E domain (WYAA, with W83 and Y85 changed to alanines) fails to support cell  
358 division<sup>19, 70</sup>. We reason that if the E domain activates sPG synthesis by forming a  
359 processive, directional moving complex with FtsWI, the failure of the WYAA mutant to  
360 activate sPG synthesis may be mediated through the dissolution of the processive  
361 complex. Because the WYAA mutant is lethal due to the lack of FtsWI activity, to test this

362 hypothesis, we took advantage of an *ftsB* superfission variant strain (*ftsB*<sup>E56A</sup>  $\Delta$ *ftsN*) in  
363 which FtsWI is constitutively active without FtsN<sup>19</sup>.

364 We first constructed a FtsN<sup>WYAA</sup>-Halo<sup>SW</sup> fusion and expressed it from a plasmid in the  
365 superfission variant *ftsB*<sup>E56A</sup>  $\Delta$ *ftsN* background (Strain JL398 in **Table S1**). As a control,  
366 we also expressed the wild-type FtsN-Halo<sup>SW</sup> in the same strain background (Strain JL397  
367 in **Table S1**). We observed that both FtsN<sup>WYAA</sup>-Halo<sup>SW</sup> and wild-type FtsN-Halo<sup>SW</sup> exhibited  
368 similar levels of midcell localization (**Figure 4A**), as FtsN's major localization  
369 determinant—the SPOR domain—remains intact in both fusion proteins. However, the  
370 majority of FtsN<sup>WYAA</sup>-Halo<sup>SW</sup> fusion protein remained stationary at septa as the directional  
371 moving population was significantly diminished to ~ 11% compared to that of wild-type  
372 FtsN-Halo<sup>SW</sup> (~ 44%) (**Figure 4B, Table S12**). Combined with our previous observation  
373 that FtsW's slow-moving population is also significantly reduced in this strain background  
374 even though FtsN is no longer essential<sup>42</sup>, this finding suggests that the formation of the  
375 processive sPG synthesis complex between FtsN and FtsWI is indeed mediated by the  
376 two conserved residues and crucial for activating FtsWI.

377 Finally, to address directly whether the E domain itself is sufficient for the processive  
378 movement of FtsN, we tracked the dynamics of a Halo fusion to only the E domain  
379 containing helix 1 and the essential helix 2 (amino acids 61 to 105) in the same *ftsB*<sup>E56A</sup>  
380  $\Delta$ *ftsN* strain background (Strain JL399 in **Table S1**). Remarkably, although Halo-FtsN<sup>E</sup>  
381 lacks the major septum localization determinant, the SPOR domain, its midcell localization  
382 is still evident (**Figure 4A**), demonstrating that its interaction with the sPG synthesis  
383 complex is independent of the SPOR domain and sufficient for its septum localization.  
384 Most interestingly, Halo-FtsN<sup>E</sup> moved processively in ~ 63% of the SMT segments (**Figure**  
385 **4B**), and that a new, fast-moving population (70% of all moving segments,  $v = 28.8 \pm 6.3$   
386  $\text{nm s}^{-1}$ ,  $\mu \pm \text{s.e.m.}$ ,  $n = 127$  segments, **Table S12**) emerged in addition to the slow-moving  
387 population (30%,  $v = 8.4 \pm 1.9 \text{ nm s}^{-1}$ ,  $\mu \pm \text{s.e.m.}$ ,  $n = 75$  segments, **Table S12**). Because  
388 the two moving populations resemble closely the FtsZ's treadmilling-dependent, fast-  
389 moving population and the sPG synthesis-dependent, slow-moving population of FtsW  
390 (**Figure S12**), this result strongly supports the notion that the E domain itself is sufficient  
391 to form the processive complex with FtsWI, and that such a complex can be maintained  
392 even on the Z-track when the SPOR domain is absent. In other words, the SPOR domain  
393 may be the major determinant to prevent the release of the sPG synthesis complex from  
394 the sPG-track to the Z-track.

## 395 Discussion

396 FtsN, a late recruit to the *E. coli* divisome, works through FtsA and the FtsQLB complex  
397 to activate synthesis of septal PG by FtsWI. Previous work has shown that FtsWI moves  
398 directionally around the circumference of the division site on two tracks, one driven by  
399 FtsZ treadmilling (Z-track), the other driven by sPG synthesis (sPG-track). Only FtsWI in  
400 the sPG-track is actively engaged in sPG synthesis. Previous work also revealed that FtsN  
401 activates FtsWI by redistributing it from the Z-track to the sPG-track, but how FtsN does  
402 so was unclear. In principle FtsN might localize to the Z-track and prevent or even disrupt  
403 binding of FtsWI to the Z-track. Alternatively, FtsN might localize to the sPG-track and  
404 capture or retain FtsWI. Finally, FtsN might move dynamically between the two tracks with

405 differential conformations and/or by formation of different complexes. Our findings, as  
406 detailed below, favor a model (**Figure 4C**) in which FtsN operates from the sPG-track to  
407 capture or retain FtsWI by forming a processively moving sPG synthesis complex with  
408 FtsWI and presumably other divisome proteins as well, most notably FtsQLB.

409 We observed that FtsN exhibits distinct septal organization and dynamics compared to  
410 those of the Z-ring. About half of the FtsN molecules in these rings are essentially static,  
411 most likely anchored by FtsN's SPOR domain to denuded glycans in sPG. The other half  
412 move processively at a speed of  $\sim 9 \text{ nm s}^{-1}$ . This velocity is essentially identical to that of  
413 the slow-moving population of FtsWI actively engaged in sPG synthesis and much slower  
414 than the  $\sim 30 \text{ nm s}^{-1}$  velocity of treadmilling FtsZ. Several additional findings support that  
415 the directionally moving population of FtsN molecules is driven by sPG synthesis on the  
416 sPG-track rather than treadmilling on the Z-track. First, the speed of FtsN is indifferent to  
417 perturbations of the treadmilling speed of FtsZ, as shown here using a series of *ftsZ*  
418 GTPase mutants (**Figure 2E**). Second, the fraction of FtsN molecules moving processively,  
419 and even their speed, can be increased by increasing the rate of sPG synthesis using a  
420 superfission mutation and increasing the supply of PG precursors (**Figure 3D**). Finally, the  
421 population of directionally moving FtsN molecules was decreased by impeding PG  
422 synthesis, which was accomplished by restricting the supply of PG precursors, inhibiting  
423 the glycosyltransferase activity of FtsW or inhibiting the transpeptidase activity of FtsI  
424 (**Figure 3A, B**).

425 Our findings also support that FtsN is part of an sPG synthesis complex together with  
426 FtsWI and potentially other divisome proteins such as FtsQLB. Not only the average speed  
427 of FtsN, but also its speed distribution, average run times and average run length, are,  
428 within error, identical to those of FtsWI under the EZRDM rich growth and UppS  
429 overexpression conditions (**Figure S11**). Under these two conditions, nearly all FtsW  
430 molecules are engaged in sPG synthesis and hence exhibit only one slow-moving, active  
431 population on the sPG-track, identical to that of FtsN. Moreover, tracking of various mutant  
432 derivatives of FtsN revealed that the only domain required for the processive complex  
433 formation on the sPG-track is the Essential (E) domain, which is proposed to interact with  
434 the sPG synthesis machinery FtsWI, likely via the FtsQLB complex<sup>15, 16, 18, 19</sup>. Most  
435 importantly, such a complex is crucial for activating and sustaining sPG synthesis in a  
436 processive manner, as a double point mutation that inactivates the E domain (WYAA)  
437 prevents formation of the processive complex and causes failure of cell division. Although  
438 the E domain has also been implicated in binding to the bifunctional PG synthases PBP1a  
439 and PBP1b<sup>71-73</sup>, these enzymes are not known to move processively<sup>13, 74</sup>, so they are not  
440 strong candidates to account for the directional movement of FtsN. They could, however,  
441 interact with the stationary population of septal FtsN, which requires further investigation.

442 Additionally, we have obtained evidence showing that the interaction between FtsN and  
443 FtsA, mediated by the cytoplasmic domain of FtsN, likely has a minimal contribution to the  
444 activation of FtsWI once constriction has commenced. Instead, the FtsN-FtsA interaction  
445 likely plays an important role in recruiting and redistributing FtsN along the septum through  
446 FtsZ's treadmilling dynamics. In support of this notion, we found that abrogating the FtsN-  
447 FtsA interaction, either by deleting the cytoplasmic domain or introducing a D5N  
448 substitution, resulted in mild cell elongation, probably due to delayed recruitment of FtsN  
449 to the divisome, but did not diminish the slow-moving, sPG synthesis-engaged population  
450 of FtsN or result in cell division failure (**Figure 2F-H**). Conversely, in the absence of the

451 periplasmic domains (E and SPOR), FtsN<sup>Cyto-TM</sup> moved at the same fast speed as  
452 treadmilling FtsZ polymers and exhibited the same speed dependence in FtsZ's GTPase  
453 mutants (**Figure 2I-K**) as we previously observed for the fast-moving population of FtsWI.  
454 These observations imply that the interaction between FtsN's SPOR domain and denuded  
455 glycans is stronger than that between FtsN's cytoplasmic domain and FtsA. As a  
456 consequence, full length FtsN molecules cannot end-track treadmilling FtsZ polymers  
457 once they bind to denuded glycans.

458 Taken together, our data suggests a model wherein FtsN activates sPG synthesis by  
459 forming a processive complex with FtsWI (**Figure 4C**). In this model, FtsN is first recruited  
460 to the septum through the interaction between its cytoplasmic tail with FtsA, and is  
461 distributed around the septum by treadmilling FtsZ polymers. This period may be too  
462 transitory for us to observe a significant population of fast-moving, full length FtsN  
463 molecules in our experiments. After the onset of constriction, FtsN binds to denuded  
464 glycan strands through its SPOR domain, which diminishes the interaction between FtsN  
465 and FtsA and creates a pool of stationary FtsN molecules at the septum. The interaction  
466 between FtsN's E domain with FtsWI (either directly or through FtsQLB) mediates  
467 formation of an activated sPG synthesis complex that engages in processive sPG  
468 synthesis. Presumably FtsN has to release its hold on denuded glycans to move  
469 processively with FtsWI; such release might happen spontaneously or be triggered by  
470 interaction of the E domain with FtsWI. Subsequently, stochastic or regulated dissociation  
471 of FtsN from the synthesis complex may result in the termination of sPG synthesis, which  
472 could release FtsWI to the fast Z-track. Dissociated FtsN could rebind with denuded glycan  
473 strands, waiting for the next activation event. According to this model, the major function  
474 of the SPOR domain is to prevent FtsN from diffusing away from the septum or  
475 reassociating with the fast-moving FtsZ-track, which would bring FtsWI away from the sPG  
476 synthesis track. These new possibilities about FtsN's function will be the subject of future  
477 studies.

478

479

480

481

482

483

484

485

486

487

488

489

## 490 Figure Legends

491

### 492 **Figure 1. FtsN-ring has different organization and dynamics compared to FtsZ-ring.**

493 (A) Schematic drawing of FtsN's domain organization and interaction with other divisome  
494 proteins. FtsN is recruited to and localizes to the division site through the interaction of its  
495 cytoplasmic domain (Cyto) with FtsA and its periplasmic SPOR domain with septal  
496 peptidoglycan (sPG). The sPG synthase complex FtsWI is activated by FtsN's essential  
497 domain (E) either directly or indirectly via FtsQLB.

498 (B) Three-dimensional (3D) live cell single-molecule localization superresolution  
499 microscopy (SMLM) images show FtsN-rings (left) are patchy but more homogenously  
500 than FtsZ-rings (middle). Rings with similar diameters and localization numbers are  
501 chosen for comparison. Yellow dashes mark cell outlines for illustrative purpose. Scale  
502 bars, 500 nm. Toroid ring models (cyan) are shown on the right, with the average ring  
503 width along the long axis of cells at  $86 \pm 3$  nm and average radial thickness at  $51 \pm 4$  nm,  
504  $n = 72$  rings for FtsN-rings, and width at  $84 \pm 2$  nm and radial thickness at  $47 \pm 2$  nm,  $n =$   
505 103 rings for FtsZ-rings. All measurements are expressed as mean  $\pm$  standard error of the  
506 mean,  $\mu \pm s.e.m.$

507 (C) Mean spatial autocorrelation function (ACF) curves of FtsN-rings (red open circle,  $n =$   
508 72 cells) and FtsZ-rings (gray open triangle,  $n = 103$  cells) averaged from all individual  
509 cells' ACFs. x-axis ( $r$ ) is the distance between each molecule pair. Error bars represent  
510  $s.e.m.$  The lower correlation value at short distances and longer characteristic decay  
511 length of FtsN's ACF indicate a more homogenous distribution of FtsN in the rings  
512 compared to that of FtsZ.

513 (D) A pseudo time course of FtsN's (red open circle) and FtsZ's (gray open triangle)  
514 midcell localization percentages ( $I_{ring}/I_{whole\ cell}$ ) during cell division. FtsN assemble and  
515 disassemble at a later stage of cell division than FtsZ.

516 (E) Mean FRAP recovery curve of FtsN (red,  $n = 58$  cells) exhibits slower and lower  
517 recovery than that of FtsZ (gray, data from a previous work<sup>38</sup>). Examples of raw FRAP  
518 images of a GFP-FtsN expressing cell (Strain EC4240 in **Table S1**) are shown as inset  
519 (arrowhead shows the bleaching area, **Figure S6A**). Scale bar, 300 nm.

520 (F) Maximum intensity projection (MIP, left) and montages (0-40 s) from time-lapse  
521 imaging of a cell with a clearly visible midcell FtsN-ring using TIRF-SIM. Scale bar, 300  
522 nm. Kymograph is compiled from the fluorescent intensity along the septum over time.  
523 The arrowhead points to a moving cluster while the arrow points to a stationary cluster.  
524 Scale bar, 200 nm.

525 (G) Speed distribution of processively moving FtsN clusters combined from both TIRF-  
526 SIM and TIRF imaging (gray columns) overlaid with the corresponding fit curve (solid red)  
527 and a fit curve of FtsZ's treadmilling speed distribution (dash gray, data from a previous  
528 work<sup>42</sup>). The average moving speed of combined FtsN clusters is  $8.7 \pm 0.2$  nm s<sup>-1</sup>,  $\mu \pm$   
529  $s.e.m.$ ,  $n = 205$  clusters. A break of the x-axis from 21 to 94 nm s<sup>-1</sup> was used to  
530 accommodate the distinct speed distributions between FtsN and FtsZ clusters.

531

532

533

534

535 **Figure 2. FtsN exhibits a single processive moving population slower than, and**  
536 **independent of, the treadmilling dynamics of FtsZ.**

537 (A-C) Representative maximum fluorescence intensity projection images (left),  
538 kymographs of fluorescence line scans at the septa (marked by yellow arrow head,  
539 middle), and unwrapped one-dimensional positions of the corresponding FtsN-Halo<sup>SW</sup>  
540 molecule (right) along the circumference of the cell of a stationary FtsN-Halo<sup>SW</sup> molecule  
541 (A), a directionally moving FtsN-Halo<sup>SW</sup> molecule (B), and an FtsN-Halo<sup>SW</sup> molecule that  
542 transitioned between different directions and speeds (C). Each segment was fit by a  
543 straight-line and classified as stationary (black) or processively moving (red) based on a  
544 statistic criterion. Scale bars, 500 nm.

545 (D) FtsN's speed distribution (gray columns) overlaid with the fit curves of the stationary  
546 (solid black) and moving (solid red) populations. For comparison, the fit curves of the slow-  
547 moving population of FtsW molecules (dash red, data from a previous work<sup>42</sup>) and FtsZ's  
548 treadmilling speed distribution (dash gray, data from a previous work<sup>38</sup>) were  
549 superimposed. A break of the x-axis from 22 to 93 nm s<sup>-1</sup> was used to accommodate the  
550 distinct speed distributions between FtsN and FtsZ.

551 (E) Speed distributions of single FtsN-Halo<sup>SW</sup> molecules in WT and *ftsZ* GTPase mutant  
552 strains overlaid with corresponding fit curves (stationary population in black and moving  
553 population in red).

554 (F) Schematic representation of two FtsN mutants, FtsN<sup>D5N</sup>-Halo<sup>SW</sup> (left) and Halo-  
555 FtsN<sup>ΔCyto-TM</sup> (right). In the FtsN<sup>D5N</sup>-Halo<sup>SW</sup> mutant, the black star in the cytoplasmic tail  
556 represents the D5N mutation. In both mutants, the green bubble represents the Halo tag  
557 and the red star represents the JF646 dye. Representative ensemble fluorescence cell  
558 images are shown at the bottom. Scale bars, 1 μm.

559 (G) Speed distributions of single FtsN<sup>D5N</sup>-Halo<sup>SW</sup> (top) and Halo-FtsN<sup>ΔCyto-TM</sup> (bottom)  
560 molecules overlaid with corresponding fit curves.

561 (H) Percentage of moving population (black triangle) and average moving speed (red cycle)  
562 of FtsN are independent of FtsZ's treadmilling speed. FtsN<sup>D5N</sup> and FtsN<sup>ΔCyto-TM</sup> data are  
563 shown in blue and orange, respectively.

564 (I) Schematic representation of FtsN<sup>Cyto-TM</sup>-Halo<sup>SW</sup> (left) and FtsN<sup>Cyto-TM-D5N</sup>-Halo<sup>SW</sup> (right).  
565 Representative ensemble fluorescence cell images are shown at the bottom. Scale bars,  
566 1 μm.

567 (J) Speed distributions of single FtsN<sup>Cyto-TM</sup>-Halo<sup>SW</sup> molecules in WT and *ftsZ* GTPase  
568 mutant strains overlaid with corresponding fit curves (stationary population in black and  
569 moving population in red).

570 (K) Percentage of moving population (black triangle) and average moving speed (red cycle)  
571 of FtsN<sup>Cyto-TM</sup> are dependent on FtsZ's treadmilling speed.

572

573

574

575

576

577

578

579

580

581 **Figure 3. FtsN's processive moving population is driven by sPG synthesis activity.**  
582 (A) Speed distributions and the corresponding fit curves of the stationary (black) and  
583 moving (red) populations of single FtsN-Halo<sup>SW</sup> molecules in the BW25113 WT (top) and  
584 *ftsW*<sup>302C</sup> variant strain in the absence (middle) or presence (bottom) of MTSES.  
585 (B) Speed distributions of single FtsN-Halo<sup>SW</sup> molecules in the MG1655 WT strain treated  
586 with aztreonam (top) or fosfomycin (middle). Fixed cells without antibiotic treatment were  
587 shown as a control (bottom).  
588 (C) Percentage of the processively moving population of FtsN (grey bar) gradually  
589 decreased when sPG synthesis is inhibited under the conditions in (A and B).  
590 (D) Speed distributions of single FtsN-Halo<sup>SW</sup> molecules in the MG1655 *ftsI*<sup>R167S</sup>  
591 superfission variant strain background grown in M9-glucose, EZRDM or in EZRDM  
592 medium with UppS overproduction (top to bottom).  
593 (E) Percentage of the processive moving population (grey bar) and average moving speed  
594 (red cycle) under conditions in (D).  
595  
596  
597  
598  
599

600 **Figure 4. FtsN's E domain is sufficient to form a processive complex with FtsWI on**  
601 **the sPG-track.**  
602 (A) Schematic representation of FtsN-Halo<sup>SW</sup>, FtsN<sup>WYAA</sup>-Halo<sup>SW</sup>, and Halo-FtsN<sup>E</sup>. The  
603 black star in FtsN<sup>WYAA</sup>-Halo<sup>SW</sup> represents the W83A and Y85A double substitution. The  
604 green circle represents the Halo tag and the red star represents the JF646 dye.  
605 Representative ensemble fluorescence cell images are shown in the bottom panel. Scale  
606 bars, 1  $\mu$ m.  
607 (B) Speed distributions and corresponding fit curves for stationary (black), slow-moving  
608 (red) and fast-moving (blue) populations of single FtsN-Halo<sup>SW</sup>, FtsN<sup>WYAA</sup>-Halo<sup>SW</sup>, and  
609 Halo-FtsN<sup>E</sup> molecules in the superfission variant *ftsB*<sup>E56A</sup>  $\Delta$ *ftsN* background (top to bottom).  
610 A break of the x-axis from 32 to 79 nm s<sup>-1</sup> was used to accommodate the different scales  
611 of the slow- and fast-moving populations of FtsN<sup>E</sup>.  
612 (C) A model depicting how FtsN activates sPG synthesis. FtsN is first recruited to the  
613 septum through the interaction between its cytoplasmic tail with FtsA, and is distributed  
614 around the septum by treadmilling FtsZ polymers. Next, at the onset of constriction, FtsN  
615 binds to denuded glycan strands through its SPOR domain, which diminishes the  
616 interaction between FtsN and FtsA and renders FtsN stationary at the septum. The  
617 interaction between FtsN's E domain with FtsWI (either directly or through FtsQLB)  
618 releases FtsN from denuded glycan strands and results the formation of an activated sPG  
619 synthesis complex, which engages in processive sPG synthesis. The active complex is  
620 sustained on the sPG-track by the presence of FtsN in the complex. Stochastic or  
621 regulated dissociation of FtsN from the complex may result in the termination of sPG  
622 synthesis, which could release FtsWI to the fast Z-track. Dissociated FtsN could rebind  
623 with denuded glycan strands, waiting for the next activation event.  
624  
625

## 626 References

- 627 1. Deng, Y., Sun, M. & Shaevitz, J.W. Direct measurement of cell wall stress stiffening  
628 and turgor pressure in live bacterial cells. *Phys. Rev. Lett.* **107**, 158101 (2011).
- 629 2. Whatmore, A.M. & Reed, R.H. Determination of turgor pressure in *Bacillus subtilis*:  
630 a possible role for K<sup>+</sup> in turgor regulation. *J. Gen. Microbiol.* **136**, 2521-2526 (1990).
- 631 3. Schneider, T. & Sahl, H.G. An oldie but a goodie - cell wall biosynthesis as  
632 antibiotic target pathway. *Int. J. Med. Microbiol.* **300**, 161-169 (2010).
- 633 4. Silver, L.L. Does the cell wall of bacteria remain a viable source of targets for novel  
634 antibiotics? *Biochem. Pharmacol.* **71**, 996-1005 (2006).
- 635 5. Egan, A.J.F., Errington, J. & Vollmer, W. Regulation of peptidoglycan synthesis  
636 and remodelling. *Nat. Rev. Microbiol.* **18**, 446-460 (2020).
- 637 6. den Blaauwen, T., Hamoen, L.W. & Levin, P.A. The divisome at 25: the road ahead.  
638 *Curr. Opin. Microbiol.* **36**, 85-94 (2017).
- 639 7. Du, S. & Lutkenhaus, J. Assembly and activation of the *Escherichia coli* divisome.  
640 *Mol. Microbiol.* **105**, 177-187 (2017).
- 641 8. de Boer, P., Crossley, R. & Rothfield, L. The essential bacterial cell-division protein  
642 FtsZ is a GTPase. *Nature* **359**, 254-256 (1992).
- 643 9. RayChaudhuri, D. & Park, J.T. *Escherichia coli* cell-division gene ftsZ encodes a  
644 novel GTP-binding protein. *Nature* **359**, 251-254 (1992).
- 645 10. Addinall, S.G., Cao, C. & Lutkenhaus, J. FtsN, a late recruit to the septum in  
646 *Escherichia coli*. *Mol. Microbiol.* **25**, 303-309 (1997).
- 647 11. Gerding, M.A. *et al.* Self-enhanced accumulation of FtsN at Division Sites and  
648 Roles for Other Proteins with a SPOR domain (DamX, DedD, and RlpA) in  
649 *Escherichia coli* cell constriction. *J. Bacteriol.* **191**, 7383-7401 (2009).
- 650 12. Pichoff, S. & Lutkenhaus, J. Tethering the Z ring to the membrane through a  
651 conserved membrane targeting sequence in FtsA. *Mol. Microbiol.* **55**, 1722-1734  
652 (2005).
- 653 13. Cho, H. *et al.* Bacterial cell wall biogenesis is mediated by SEDS and PBP  
654 polymerase families functioning semi-autonomously. *Nat. Microbiol.* **1**, 16172  
655 (2016).
- 656 14. Taguchi, A. *et al.* FtsW is a peptidoglycan polymerase that is functional only in  
657 complex with its cognate penicillin-binding protein. *Nat. Microbiol.* **4**, 587-594  
658 (2019).
- 659 15. Marmont, L.S. & Bernhardt, T.G. A conserved subcomplex within the bacterial  
660 cytokinetic ring activates cell wall synthesis by the FtsW-FtsI synthase. *Proc. Natl*  
661 *Acad. Sci. USA* **117**, 23879-23885 (2020).
- 662 16. Park, K.T., Du, S. & Lutkenhaus, J. Essential Role for FtsL in Activation of Septal  
663 Peptidoglycan Synthesis. *mBio* **11**, e03012 (2020).
- 664 17. Busiek, K.K. & Margolin, W. A role for FtsA in SPOR-independent localization of  
665 the essential *Escherichia coli* cell division protein FtsN. *Mol. Microbiol.* **92**, 1212-  
666 1226 (2014).
- 667 18. Li, Y. *et al.* Genetic analysis of the septal peptidoglycan synthase FtsWI complex  
668 supports a conserved activation mechanism for SEDS-bPBP complexes. *PLoS*  
669 *Genet.* **17**, e1009366 (2021).
- 670 19. Liu, B., Persons, L., Lee, L. & de Boer, P.A. Roles for both FtsA and the FtsBLQ  
671 subcomplex in FtsN-stimulated cell constriction in *Escherichia coli*. *Mol. Microbiol.*  
672 **95**, 945-970 (2015).
- 673 20. Pichoff, S., Du, S. & Lutkenhaus, J. The bypass of ZipA by overexpression of FtsN  
674 requires a previously unknown conserved FtsN motif essential for FtsA-FtsN



- 675 interaction supporting a model in which FtsA monomers recruit late cell division  
676 proteins to the Z ring. *Mol. Microbiol.* **95**, 971-987 (2015).
- 677 21. Tsang, M.J. & Bernhardt, T.G. A role for the FtsQLB complex in cytokinetic ring  
678 activation revealed by an ftsL allele that accelerates division. *Mol. Microbiol.* **95**,  
679 925-944 (2015).
- 680 22. Alcorlo, M. *et al.* Structural basis of denuded glycan recognition by SPOR domains  
681 in bacterial cell division. *Nat. Commun.* **10**, 5567 (2019).
- 682 23. Yahashiri, A., Jorgenson, M.A. & Weiss, D.S. Bacterial SPOR domains are  
683 recruited to septal peptidoglycan by binding to glycan strands that lack stem  
684 peptides. *Proc. Natl Acad. Sci. USA* **112**, 11347-11352 (2015).
- 685 24. Ursinus, A. *et al.* Murein (peptidoglycan) binding property of the essential cell  
686 division protein FtsN from *Escherichia coli*. *J. Bacteriol.* **186**, 6728-6737 (2004).
- 687 25. Heidrich, C. *et al.* Involvement of N-acetylmuramyl-L-alanine amidases in cell  
688 separation and antibiotic-induced autolysis of *Escherichia coli*. *Mol. Microbiol.* **41**,  
689 167-178 (2001).
- 690 26. Dik, D.A., Marous, D.R., Fisher, J.F. & Mobashery, S. Lytic transglycosylases:  
691 concinnity in concision of the bacterial cell wall. *Crit. Rev. Biochem. Mol. Biol.* **52**,  
692 503-542 (2017).
- 693 27. Typas, A., Banzhaf, M., Gross, C.A. & Vollmer, W. From the regulation of  
694 peptidoglycan synthesis to bacterial growth and morphology. *Nat. Rev. Microbiol.*  
695 **10**, 123-136 (2011).
- 696 28. Vollmer, W. & Bertsche, U. Murein (peptidoglycan) structure, architecture and  
697 biosynthesis in *Escherichia coli*. *Biochim. Biophys. Acta* **1778**, 1714-1734 (2008).
- 698 29. McQuillen, R. & Xiao, J. Insights into the Structure, Function, and Dynamics of the  
699 Bacterial Cytokinetic FtsZ-Ring. *Annu. Rev. Biophys.* **49**, 309-341 (2020).
- 700 30. Xiao, J. & Goley, E.D. Redefining the roles of the FtsZ-ring in bacterial cytokinesis.  
701 *Curr. Opin. Microbiol.* **34**, 90-96 (2016).
- 702 31. Buss, J. *et al.* In vivo organization of the FtsZ-ring by ZapA and ZapB revealed by  
703 quantitative super-resolution microscopy. *Mol. Microbiol.* **89**, 1099-1120 (2013).
- 704 32. Buss, J. *et al.* A multi-layered protein network stabilizes the *Escherichia coli* FtsZ-  
705 ring and modulates constriction dynamics. *PLoS Genet.* **11**, e1005128 (2015).
- 706 33. Coltharp, C., Buss, J., Plumer, T.M. & Xiao, J. Defining the rate-limiting processes  
707 of bacterial cytokinesis. *Proc. Natl Acad. Sci. USA* **113**, 1044-1053 (2016).
- 708 34. Fu, G. *et al.* In vivo structure of the E. coli FtsZ-ring revealed by photoactivated  
709 localization microscopy (PALM). *PLoS One* **5**, e12682 (2010).
- 710 35. Holden, S.J. *et al.* High throughput 3D super-resolution microscopy reveals  
711 *Caulobacter crescentus* in vivo Z-ring organization. *Proc. Natl Acad. Sci. USA* **111**,  
712 4566-4571 (2014).
- 713 36. Lyu, Z., Coltharp, C., Yang, X. & Xiao, J. Influence of FtsZ GTPase activity and  
714 concentration on nanoscale Z-ring structure in vivo revealed by three-dimensional  
715 Superresolution imaging. *Biopolymers* **105**, 725-734 (2016).
- 716 37. Bisson-Filho, A.W. *et al.* Treadmilling by FtsZ filaments drives peptidoglycan  
717 synthesis and bacterial cell division. *Science* **355**, 739-743 (2017).
- 718 38. Yang, X. *et al.* GTPase activity-coupled treadmilling of the bacterial tubulin FtsZ  
719 organizes septal cell wall synthesis. *Science* **355**, 744-747 (2017).
- 720 39. Monteiro, J.M. *et al.* Peptidoglycan synthesis drives an FtsZ-treadmilling-  
721 independent step of cytokinesis. *Nature* **554**, 528-532 (2018).
- 722 40. Perez, A.J. *et al.* Movement dynamics of divisome proteins and PBP2x:FtsW in  
723 cells of *Streptococcus pneumoniae*. *Proc. Natl Acad. Sci. USA* **116**, 3211-3220  
724 (2019).

- 725 41. McCausland, J.W. *et al.* Treadmilling FtsZ polymers drive the directional  
726 movement of sPG-synthesis enzymes via a Brownian ratchet mechanism. *Nat.*  
727 *Commun.* **12**, 609 (2021).
- 728 42. Yang, X. *et al.* A two-track model for the spatiotemporal coordination of bacterial  
729 septal cell wall synthesis revealed by single-molecule imaging of FtsW. *Nat.*  
730 *Microbiol.* **6**, 584-593 (2021).
- 731 43. Söderström, B., Chan, H., Shilling, P.J., Skoglund, U. & Daley, D.O. Spatial  
732 separation of FtsZ and FtsN during cell division. *Mol. Microbiol.* **107**, 387-401  
733 (2018).
- 734 44. Dai, K., Xu, Y. & Lutkenhaus, J. Topological characterization of the essential  
735 *Escherichia coli* cell division protein FtsN. *J. Bacteriol.* **178**, 1328-1334 (1996).
- 736 45. Yang, J.C., Van Den Ent, F., Neuhaus, D., Brevier, J. & Lowe, J. Solution structure  
737 and domain architecture of the divisome protein FtsN. *Mol. Microbiol.* **52**, 651-660  
738 (2004).
- 739 46. Moll, A. & Thanbichler, M. FtsN-like proteins are conserved components of the cell  
740 division machinery in proteobacteria. *Mol. Microbiol.* **72**, 1037-1053 (2009).
- 741 47. Shaner, N.C. *et al.* A bright monomeric green fluorescent protein derived from  
742 *Branchiostoma lanceolatum*. *Nat. Methods* **10**, 407-409 (2013).
- 743 48. Bernhardt, T.G. & de Boer, P.A. The *Escherichia coli* amidase AmiC is a  
744 periplasmic septal ring component exported via the twin-arginine transport  
745 pathway. *Mol. Microbiol.* **48**, 1171-1182 (2003).
- 746 49. Li, G.W., Burkhardt, D., Gross, C. & Weissman, J.S. Quantifying absolute protein  
747 synthesis rates reveals principles underlying allocation of cellular resources. *Cell*  
748 **157**, 624-635 (2014).
- 749 50. Huang, B., Wang, W., Bates, M. & Zhuang, X. Three-dimensional super-resolution  
750 imaging by stochastic optical reconstruction microscopy. *Science* **319**, 810-813  
751 (2008).
- 752 51. Jacq, M. *et al.* Remodeling of the Z-Ring Nanostructure during the *Streptococcus*  
753 *pneumoniae* Cell Cycle Revealed by Photoactivated Localization Microscopy.  
754 *mBio* **6**, e01108 (2015).
- 755 52. Strauss, M.P. *et al.* 3D-SIM super resolution microscopy reveals a bead-like  
756 arrangement for FtsZ and the division machinery: implications for triggering  
757 cytokinesis. *PLoS Biol.* **10**, e1001389 (2012).
- 758 53. Anderson, D.E., Gueiros-Filho, F.J. & Erickson, H.P. Assembly dynamics of FtsZ  
759 rings in *Bacillus subtilis* and *Escherichia coli* and effects of FtsZ-regulating proteins.  
760 *J. Bacteriol.* **186**, 5775-5781 (2004).
- 761 54. Stricker, J., Maddox, P., Salmon, E.D. & Erickson, H.P. Rapid assembly dynamics  
762 of the *Escherichia coli* FtsZ-ring demonstrated by fluorescence recovery after  
763 photobleaching. *Proc. Natl Acad. Sci. USA* **99**, 3171-3175 (2002).
- 764 55. Fiolka, R., Beck, M. & Stemmer, A. Structured illumination in total internal reflection  
765 fluorescence microscopy using a spatial light modulator. *Opt. Lett.* **33**, 1629-1631  
766 (2008).
- 767 56. Kner, P., Chhun, B.B., Griffis, E.R., Winoto, L. & Gustafsson, M.G. Super-  
768 resolution video microscopy of live cells by structured illumination. *Nat. Methods* **6**,  
769 339-342 (2009).
- 770 57. Kim, S.Y., Gitai, Z., Kinkhabwala, A., Shapiro, L. & Moerner, W.E. Single  
771 molecules of the bacterial actin MreB undergo directed treadmilling motion in  
772 *Caulobacter crescentus*. *Proc. Natl Acad. Sci. USA* **103**, 10929-10934 (2006).
- 773 58. Larsen, R.A. *et al.* Treadmilling of a prokaryotic tubulin-like protein, TubZ, required  
774 for plasmid stability in *Bacillus thuringiensis*. *Genes Dev.* **21**, 1340-1352 (2007).

- 775 59. Chaikerasitak, V. *et al.* Viral Capsid Trafficking along Treadmilling Tubulin  
776 Filaments in Bacteria. *Cell* **177**, 1771-1780 (2019).
- 777 60. Grimm, J.B. *et al.* A general method to improve fluorophores for live-cell and  
778 single-molecule microscopy. *Nat. Methods* **12**, 244-250 (2015).
- 779 61. Alexeeva, S., Gadella, T.W., Jr., Verheul, J., Verhoeven, G.S. & den Blaauwen, T.  
780 Direct interactions of early and late assembling division proteins in *Escherichia coli*  
781 cells resolved by FRET. *Mol. Microbiol.* **77**, 384-398 (2010).
- 782 62. Busiek, K.K., Eraso, J.M., Wang, Y. & Margolin, W. The early divisome protein  
783 FtsA interacts directly through its 1c subdomain with the cytoplasmic domain of the  
784 late divisome protein FtsN. *J. Bacteriol.* **194**, 1989-2000 (2012).
- 785 63. Corbin, B.D., Geissler, B., Sadasivam, M. & Margolin, W. Z-ring-independent  
786 interaction between a subdomain of FtsA and late septation proteins as revealed  
787 by a polar recruitment assay. *J. Bacteriol.* **186**, 7736-7744 (2004).
- 788 64. Karimova, G., Dautin, N. & Ladant, D. Interaction network among *Escherichia coli*  
789 membrane proteins involved in cell division as revealed by bacterial two-hybrid  
790 analysis. *J. Bacteriol.* **187**, 2233-2243 (2005).
- 791 65. Pichoff, S., Du, S. & Lutkenhaus, J. Disruption of divisome assembly rescued by  
792 FtsN-FtsA interaction in *Escherichia coli*. *Proc. Natl Acad. Sci. USA* **115**, 6855-  
793 6862 (2018).
- 794 66. Baranova, N. *et al.* Diffusion and capture permits dynamic coupling between  
795 treadmilling FtsZ filaments and cell division proteins. *Nat. Microbiol.* **5**, 407-417  
796 (2020).
- 797 67. Pisabarro, A.G., Prats, R., Vaquez, D. & Rodriguez-Tebar, A. Activity of penicillin-  
798 binding protein 3 from *Escherichia coli*. *J. Bacteriol.* **168**, 199-206 (1986).
- 799 68. Kahan, F.M., Kahan, J.S., Cassidy, P.J. & Kropp, H. The mechanism of action of  
800 fosfomycin (phosphonomycin). *Ann. N. Y. Acad. Sci.* **235**, 364-386 (1974).
- 801 69. Sham, L.T. *et al.* Bacterial cell wall. MurJ is the flippase of lipid-linked precursors  
802 for peptidoglycan biogenesis. *Science* **345**, 220-222 (2014).
- 803 70. Du, S., Pichoff, S. & Lutkenhaus, J. FtsEX acts on FtsA to regulate divisome  
804 assembly and activity. *Proc. Natl Acad. Sci. USA* **113**, 5052-5061 (2016).
- 805 71. Boes, A. *et al.* The bacterial cell division protein fragment (E)FtsN binds to and  
806 activates the major peptidoglycan synthase PBP1b. *J. Biol. Chem.* **295**, 18256-  
807 18265 (2020).
- 808 72. Boes, A., Olatunji, S., Breukink, E. & Terrak, M. Regulation of the Peptidoglycan  
809 Polymerase Activity of PBP1b by Antagonist Actions of the Core Divisome Proteins  
810 FtsBLQ and FtsN. *mBio* **10**, e01912 (2019).
- 811 73. Pazos, M. *et al.* SPOR Proteins Are Required for Functionality of Class A Penicillin-  
812 Binding Proteins in *Escherichia coli*. *mBio* **11**, e02796 (2020).
- 813 74. Vigouroux, A. *et al.* Class-A penicillin binding proteins do not contribute to cell  
814 shape but repair cell-wall defects. *Elife* **9**, e51998 (2020).

815

816

817

818

819

820

## 821 Acknowledgements

822 We thank all members of the Xiao and Weiss laboratories for helpful discussions and  
823 feedback on the manuscript, members of the Weiss lab for help with strain construction,  
824 the Microscopy Facility of Johns Hopkins School of Medicine for assistance with the TIRF-  
825 SIM imaging, and Dr. L. Lavis for sharing JF549 and JF646.

826 Work in the Xiao lab was supported by NIH R01GM086447 and R35GM136436 (to J.X.),  
827 GM125656 (subcontract to J.X.), a Hamilton Smith Innovative Research Award (to J.X.),  
828 and in part by NIH GM007445 (to J.W.M.). Work in the Weiss lab was supported by NIH  
829 R01GM125656 (to D.S.W.) and in part by T32AI007511 to G.M.K.

830

## 831 Author contributions

832 D.S.W. and J.X. conceived the study. A.Y., G.M.K., D.S.W. and Z.L. constructed the  
833 strains and performed genetic and phenotypic experiments. Z.L. performed all the imaging  
834 experiments and analyzed the data. X.Y. and J.W.M. wrote the custom MATLAB script for  
835 analyzing single-molecule tracking data. Z.L. analyzed the single-molecule  
836 tracking data with help from X.Y., J.W.M. and R.M. Z.L., D.S.W. and J.X. wrote the original  
837 draft. All authors reviewed and edited the manuscript. D.S.W. and J.X. supervised the  
838 study. Funding was acquired by D.S.W. and J.X.

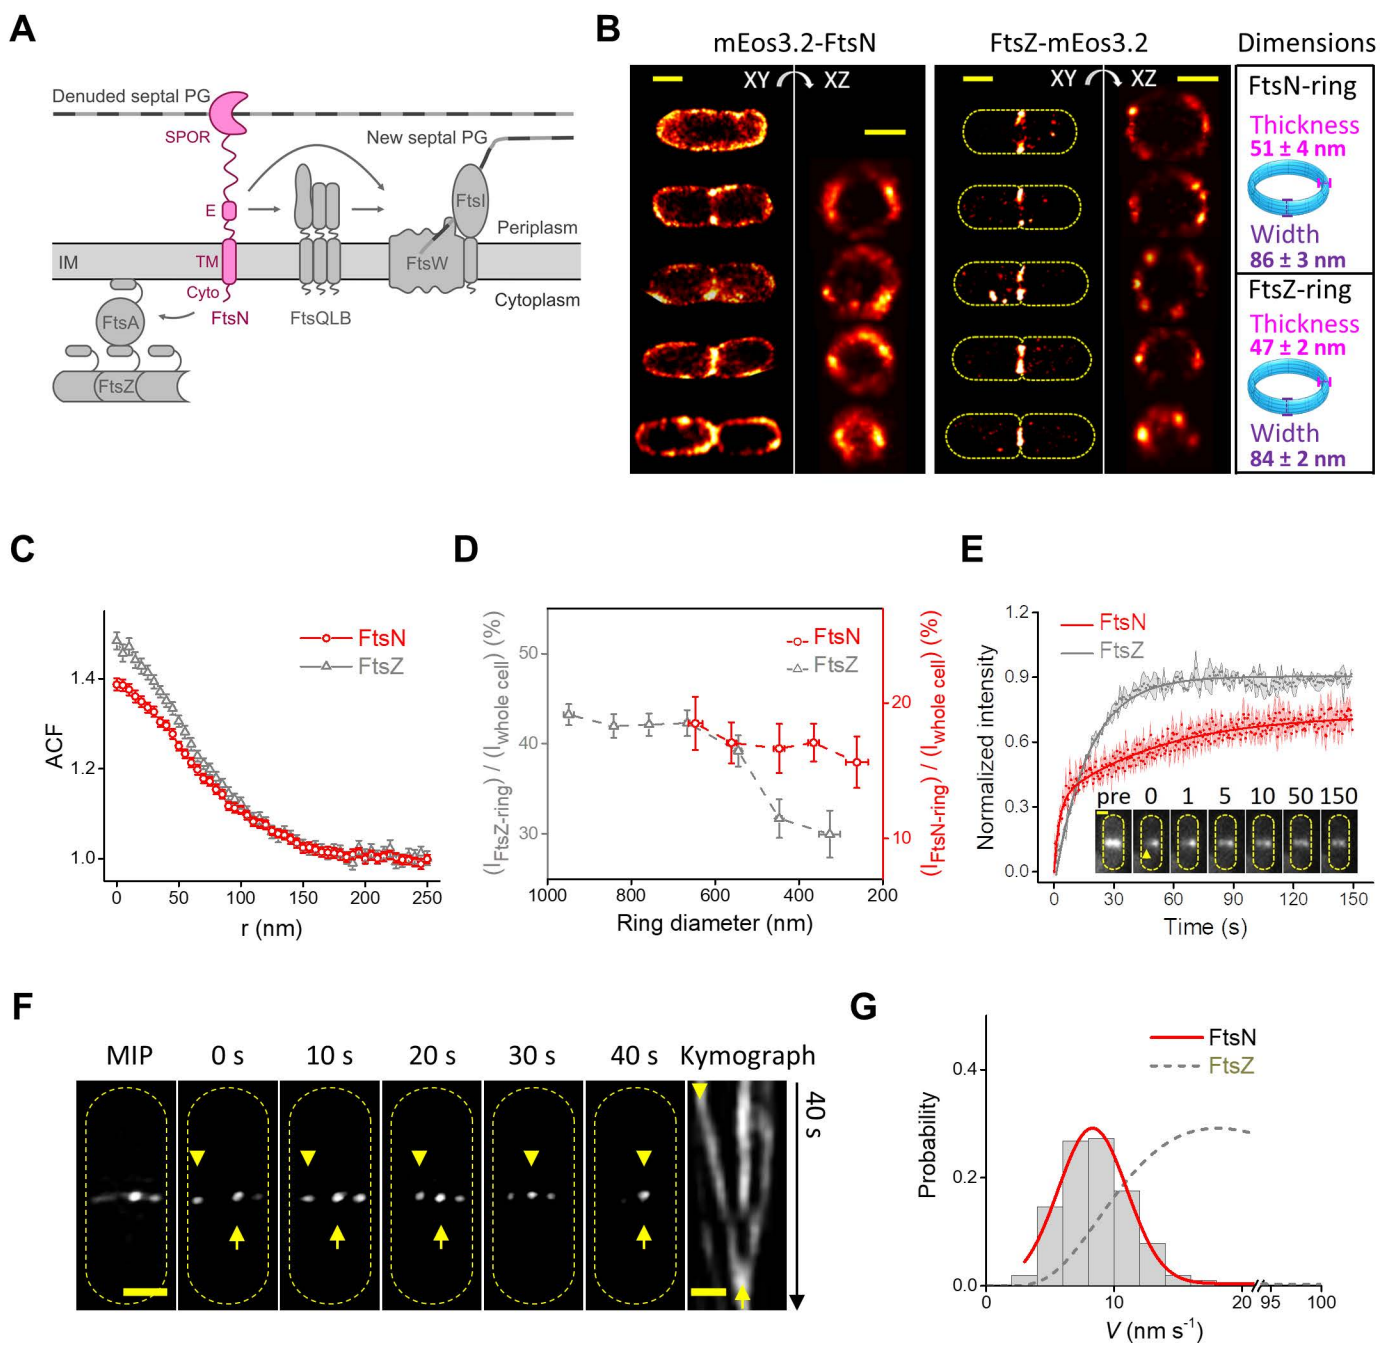

Figure 1

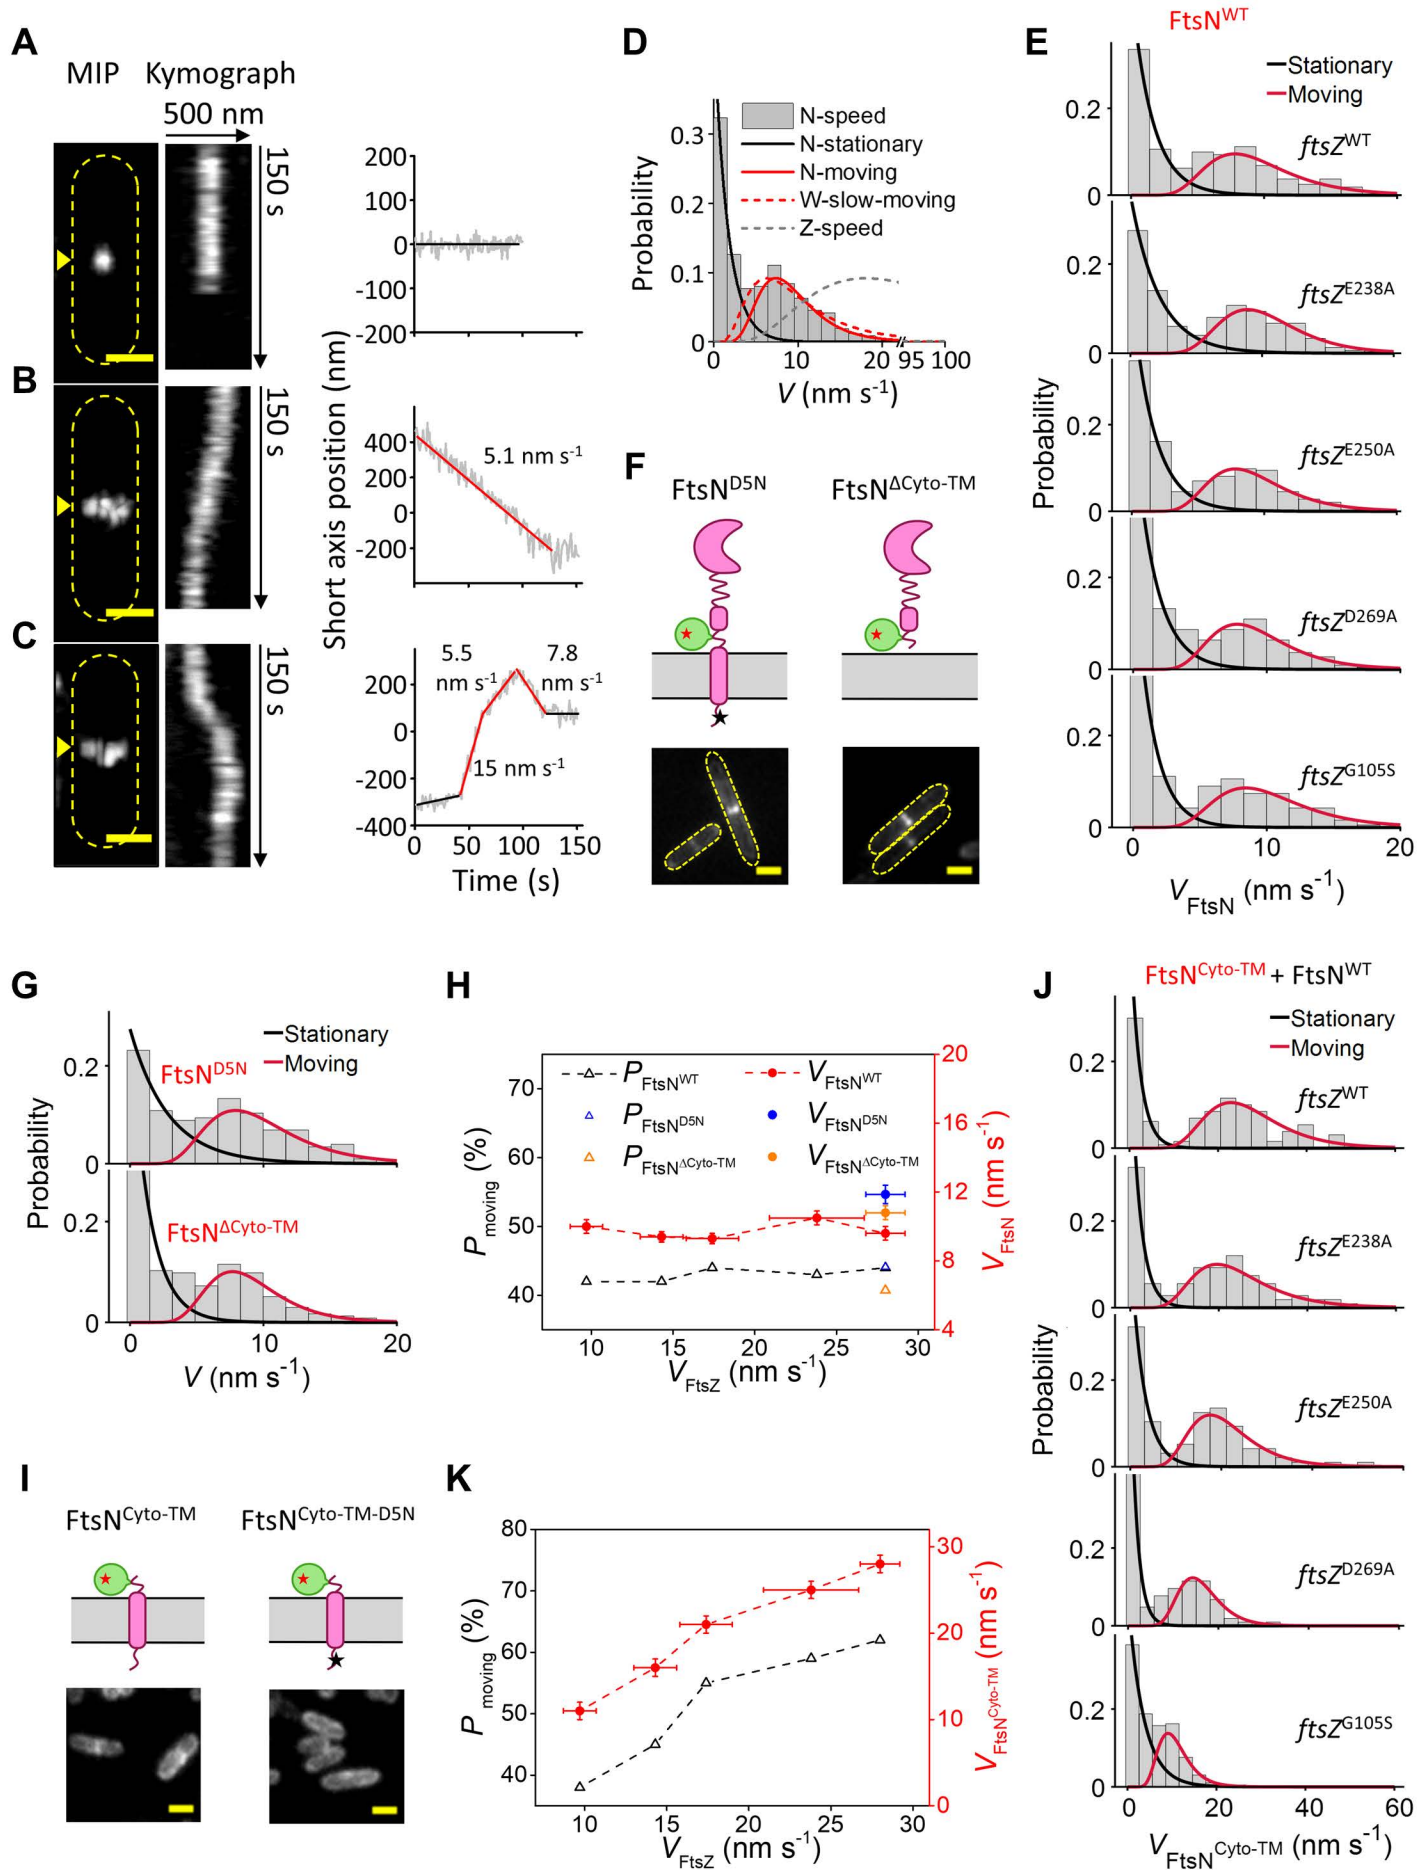

Figure 2

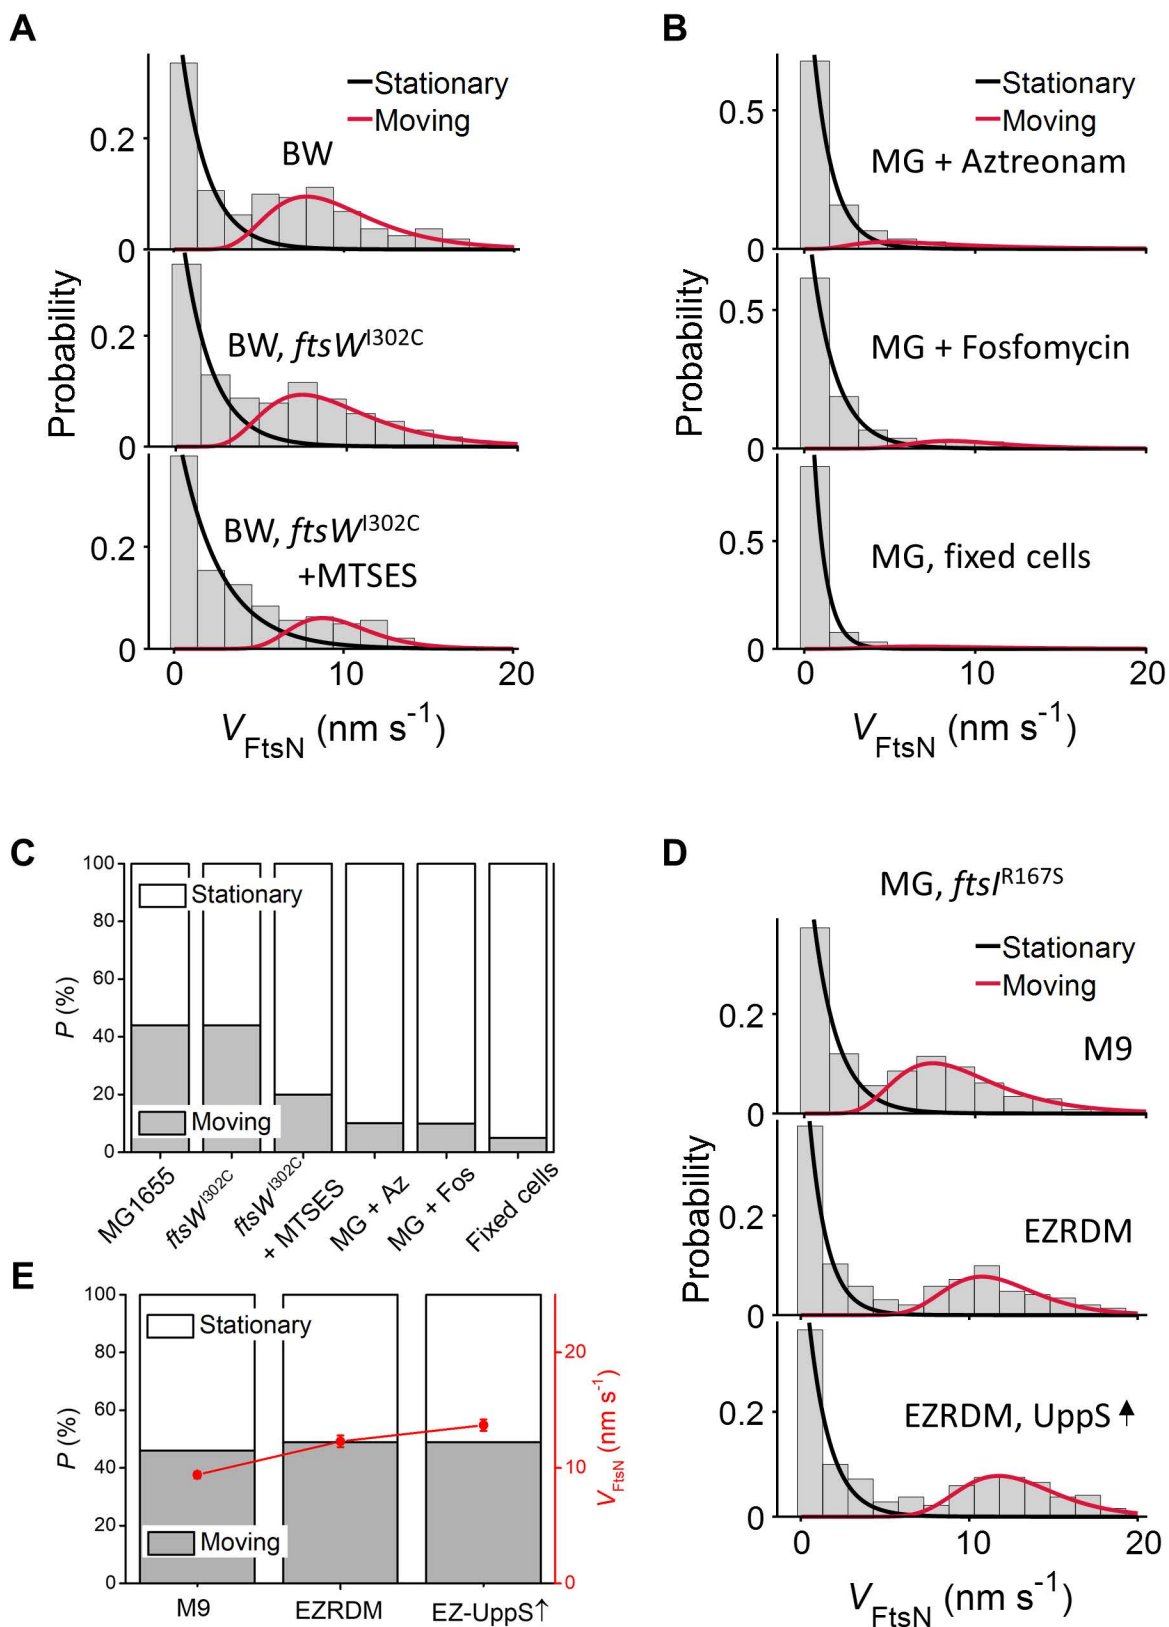

Figure 3

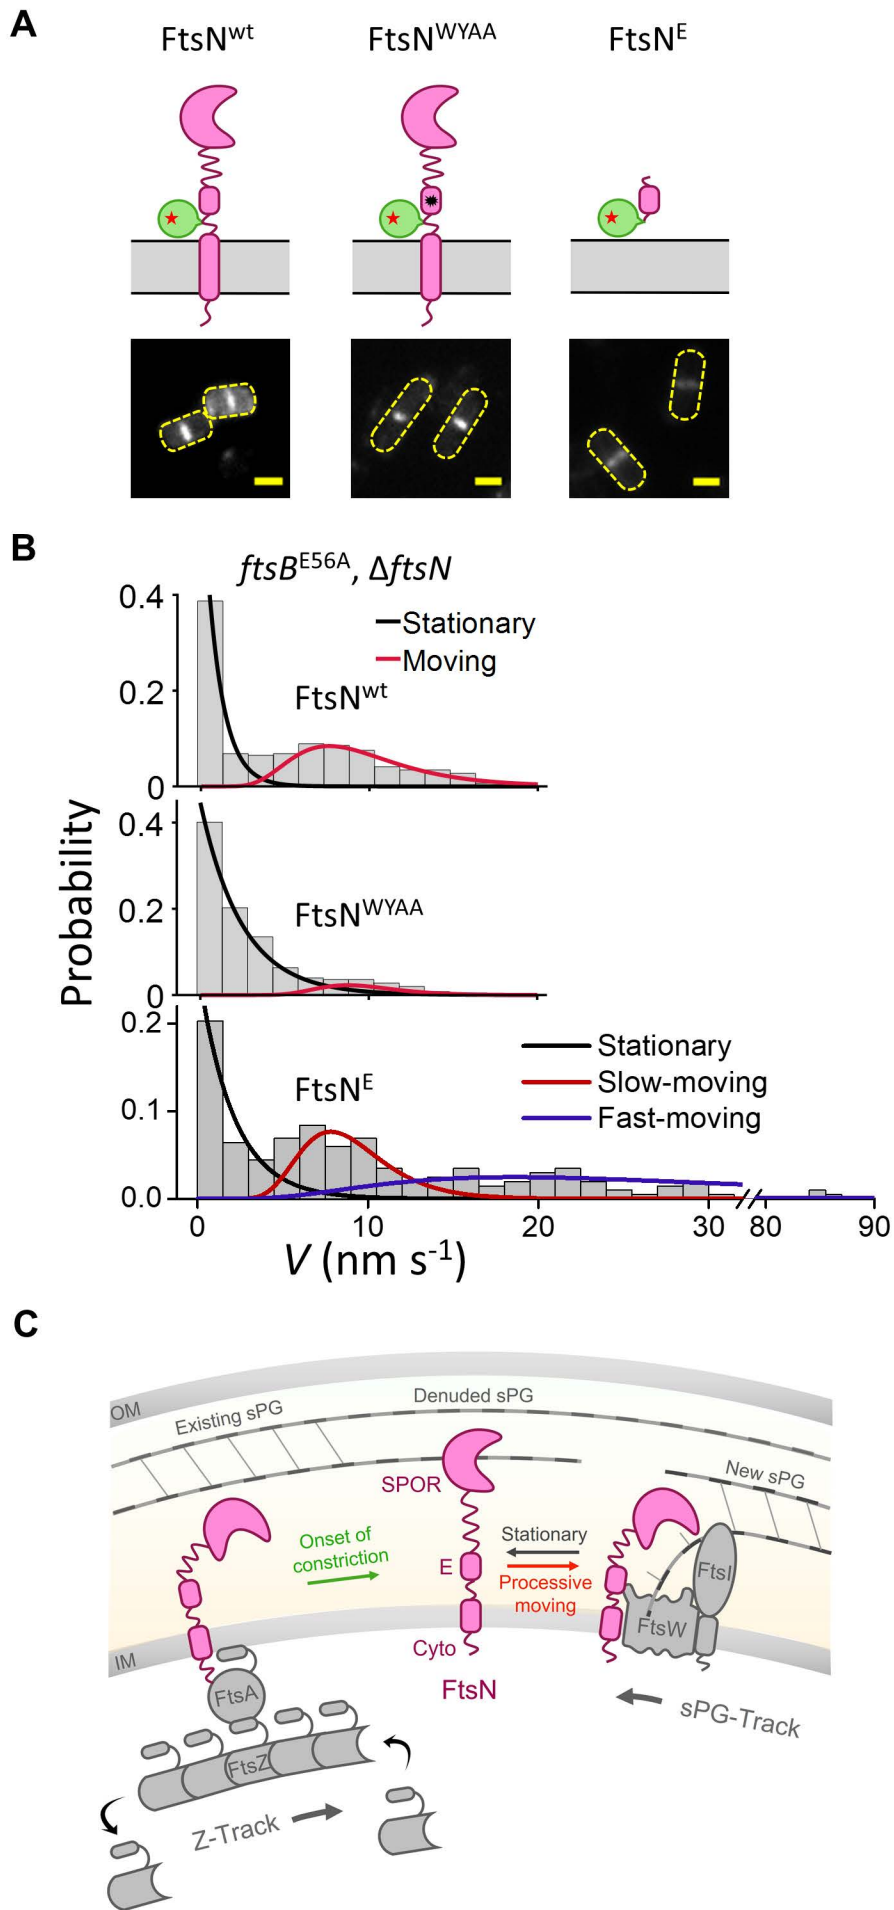

**Figure 4**
